# Supplementary material for: Parental transfer of titanium dioxide nanoparticle aggravated MCLR-induced developmental toxicity in zebrafish offspring
Source: Royal Society of Chemistry journal article supplement (doi:10.1039/c8en00865e), 2018-01-01
Supplement: c8en00865e1.pdf [file c8en00865e1.pdf]

## Supporting Information

### Parental transfer of titanium dioxide nanoparticles aggravated MCLR-induced developmental toxicity in zebrafish offspring

Qin Wu<sup>1</sup>, Wei Yan<sup>2</sup>, Chunsheng Liu<sup>1</sup>, Tien-Chieh Hung<sup>3</sup>, Guangyu Li<sup>1,4,\*</sup>

<sup>1</sup>College of Fisheries, Huazhong Agricultural University, Wuhan 430070, China

<sup>2</sup>Institute of Agricultural Quality Standards & Testing Technology, Hubei Academy of  
Agricultural Sciences, Wuhan 430064, China

<sup>3</sup>Department of Biological and Agricultural Engineering, University of California-Davis, Davis,  
CA 95616, USA

<sup>4</sup>Hubei Provincial Engineering Laboratory for Pond Aquaculture, Wuhan 430070, China

**\*Author for correspondence:**

Guangyu Li (G. Li) PhD  
College of Fisheries,  
Huazhong Agricultural University,  
Wuhan 430070, China  
Fax: 86-27-87282114  
Email: liguangyu@mail.hzau.edu.cn

**Table S1.**

Sequences of primers for the tested genes related to the neurotransmitters and neurodevelopment.

| Gene name        | Sequence of the primer (5'- 3')                                         | Gene bank accession No. |
|------------------|-------------------------------------------------------------------------|-------------------------|
| <i>gapdh</i>     | Forward: ctggtgacccgtgctgctt<br>Reverse: ttgccgccttctgcctta             | NM_001115114            |
| <i>P53</i>       | Forward: gggcaatcagcgagcaaa<br>Reverse: actgaccttcctgagtctcca           | AF365873                |
| <i>Bax</i>       | Forward: ggctatttcaaccagggttcc<br>Reverse: tgcgaatcaccaatgctgt          | AF231015                |
| <i>Bcl-2</i>     | Forward: tcactcggtcagaccctcat<br>Reverse: acgctttccacgcacat             | NM001030253             |
| <i>Bid</i>       | Forward: atgggacagtgggtgcagtttt<br>Reverse: aatctttcacttctctaactgtcaaca | NM_001079826            |
| <i>Caspase-3</i> | Forward: atgctggagaacatgccatgcag<br>Reverse: aggggtgttacttgggcctgaaga   | NM131877                |
| <i>Caspase-8</i> | Forward: tgctgcatcagaagaactaa<br>Reverse: cctccggtttgattccatc           | NM_131340               |
| <i>Caspase-9</i> | Forward: gaagacggcgaaatcgatgc<br>Reverse: ctggcggttctgacaacttc          | NM15288408              |
| <i>Puma</i>      | Forward: tggaaagcagagtggacgaa<br>Reverse: gatggcagggctggatga            | NM001045472             |
| <i>Apaf-1</i>    | Forward: ttctacagtaaagcccacc<br>Reverse: tatctagtatttccccatattcc        | AF251502                |
| <i>Mdm2</i>      | Forward: aagcagtgatcctgagagtcc<br>Reverse: atccgaagactcgctgttc          | BC096975                |

**Table S2.**

The content of MCLR in exposure water (before and after water renewal).

| samples<br>μg/L | <sup>a</sup> exposure water (μg/L) |                         | <sup>b</sup> exposure water (μg/L) |                         |
|-----------------|------------------------------------|-------------------------|------------------------------------|-------------------------|
|                 | MCLR                               | MCLR+ nTiO <sub>2</sub> | MCLR                               | MCLR+ nTiO <sub>2</sub> |
| 0               | ND                                 | ND                      | ND                                 | ND                      |
| 0.5             | 0.48±0.0099                        | 0.49±0.013              | 0.39±0.0074                        | 0.20±0.0052             |
| 4               | 3.9±0.011                          | 3.9±0.08                | 2.87±0.049                         | 1.9±0.16                |
| 32              | 30±0.59                            | 30±0.80                 | 23±0.32                            | 15.7±0.12               |

<sup>a</sup> represents the content of MCLR after water renewal.

<sup>b</sup> represents the content of MCLR before water renewal.

ND, Not detected. WW, Wet weight.

**Table S3**

The expression of apoptosis relevant genes of F1 zebrafish larvae derived from parental exposure to MCLR and co-exposure of MCLR and n-TiO<sub>2</sub>.

| Concentrations    | 0         |                         | 0.5       |                         | 4          |                         | 32        |                         |
|-------------------|-----------|-------------------------|-----------|-------------------------|------------|-------------------------|-----------|-------------------------|
| Gene <sup>a</sup> | MCLR      | MCLR+n-TiO <sub>2</sub> | MCLR      | MCLR+n-TiO <sub>2</sub> | MCLR       | MCLR+n-TiO <sub>2</sub> | MCLR      | MCLR+n-TiO <sub>2</sub> |
|                   |           |                         |           | TiO <sub>2</sub>        |            |                         |           |                         |
| <i>P53</i>        | 1.03±0.28 | 1.25±0.20               | 1.13±0.10 | 1.00±0.38               | 1.13±0.10  | 1.51±0.08*              | 1.13±0.10 | 1.94±0.13*              |
| <i>Bax</i>        | 1.01±0.14 | 1.02±0.05               | 1.04±0.08 | 1.24±0.42               | 1.18±0.22  | 1.95±0.24*              | 1.27±0.03 | 1.79±0.38*              |
| <i>Bcl-2</i>      | 1.00±0.09 | 1.03±0.04               | 1.01±0.17 | 1.25±0.32               | 1.47±0.67  | 2.2±0.25*               | 1.41±0.07 | 1.71±0.19*              |
| <i>Bid</i>        | 1.02±0.22 | 1.01±0.06               | 1.02±0.17 | 1.57±0.57*              | 1.37±0.58  | 2.17±0.13*              | 1.39±0.15 | 1.91±0.60*              |
| <i>Caspase-3</i>  | 1.01±0.17 | 1.03±0.56               | 1.12±0.09 | 1.14±0.50               | 1.06±0.20  | 2.16±0.78*              | 1.37±0.15 | 2.54±0.37*              |
| <i>Caspase-8</i>  | 1.01±0.19 | 1.34±0.17               | 1.02±0.90 | 1.04±0.30               | 1.40±0.35  | 3.54±0.25*              | 1.12±0.20 | 2.55±0.13*              |
| <i>Caspase-9</i>  | 1.01±0.13 | 1.39±0.16               | 1.05±0.24 | 1.75±0.11*              | 1.41±0.02  | 3.69±0.22*              | 1.12±0.12 | 2.34±0.49*              |
| <i>Puma</i>       | 1.04±0.33 | 1.02±0.14               | 1.03±0.16 | 1.19±0.23               | 1.25±0.18  | 1.95±0.16*              | 1.34±0.39 | 2.37±0.73*              |
| <i>Apaf-1</i>     | 1.06±0.04 | 1.31±0.16               | 1.34±0.19 | 1.60±0.27*              | 1.84±0.49* | 1.99±0.60*              | 1.31±0.13 | 2.14±0.33*              |
| <i>Mdm2</i>       | 1.00±0.02 | 0.94±0.49               | 1.01±0.13 | 0.73±0.15               | 0.98±0.40  | 0.88±0.21               | 0.65±0.25 | 0.45±0.08*              |

<sup>a</sup> Values represent means ± SEM of 3 replicates of each treatment and are expressed as fold change.

\* Significant differences at  $P<0.05$  between MCLR treated groups and the control group.

## **Test S1**

### ***The examination of the swimming behavior in F1 larvae***

The quantification of larval locomotor activity at 120 hpf was according to Huang et al. (2010) with a Video-Track system (ViewPoint LifeSciences, Montreal, Canada). Larvae that were dead or deformity could not be elected in this assay. The larvae were plated into 24-well plate. Each larva was put into one well. To eliminate the difference of every 24-well, we used 4 plates to measure locomotor behavior. Before monitoring the swimming speed, the larvae were acclimated for 10 min and the 24-wells were kept at 28°C. The swimming speed was monitored under continuous visible light and response to dark-to-light transition (5 min light, 5 min dark, 5 min light, 5 min dark). The data (frequency of movements, distance traveled, and total duration of movements) was collected every 30 s and each experiment was repeated 4 times. Further analysis of the data was using custom Open Office Org 2.4 software.

## **Test S2**

### ***RNA extraction and cDNA synthesis***

Briefly, total RNA was isolated by use of TRIzol reagent, and digested by RNase-free DNase I (Promega, WI, USA) following the manufacturer's instructions. Concentrations of total RNA were estimated at 260 nm and the quality was verified by measuring the 260/280 nm ratio. One percent agarose-formaldehyde gel electrophoresis with ethidium bromide staining was used to further verify the quality of total RNA. The cDNA was synthesized using 2 µg of RNA from each sample mixed with 500 ng of random primer (Takara, Kyoto, Japan), 10 mmol/L of dNTPs and diethylpyrocarbamate-(DEPC-) treated water to a final volume of 20 µL. The reaction was

initiated using M-MLV Reverse Transcriptase (Promega, Madison, WI, USA) following the manufacturer's protocols.

### **Test S3**

#### ***Western blot analysis***

One hundred zebrafish larvae were collected and washed twice with PBS (pH 7.4) and then homogenized in ice-cold protein extraction buffer to extract proteins (Wuhan Boster Biological Technology, China). Each set of 150 larvae was pooled for protein preparation, such that  $n = 1$  refers to protein from these 150 embryos. The homogenates were centrifuged for 10 min at 12,000  $\times g$  and supernatants were collected. Protein concentrations were determined by the Bradford method<sup>33</sup>; western blot analysis was performed with minor modifications following the previous method<sup>22</sup>. About 20 mg of protein from each sample was denatured, electrophoresed, and transferred onto a polyvinylidene fluoride (PVDF) membrane. The membrane was blocked and blots were incubated in specific antibody against p53, Bax, Bcl-2, and GAPDH (Abcam, UK), and then secondary antibodies following the manufacturer's instructions. The NBT/BCIP system was used to evaluate the protein signal. The results of the western blots were quantified with Gene Snap software (Syngene, America).

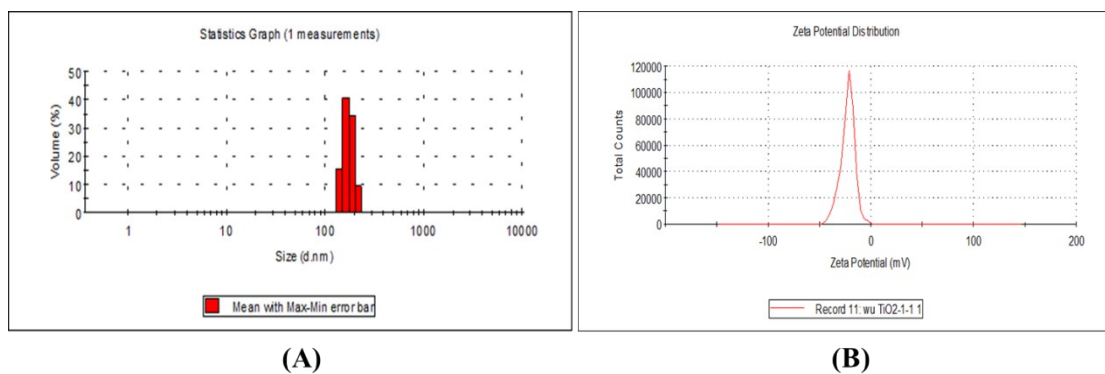

Fig. S1. The particle size of n-TiO<sub>2</sub> suspensions (A) and the distribution of particle size (n-TiO<sub>2</sub>) (B) in water were shown.
